# Supplementary material for: Vanillin production by biotransformation of phenolic compounds in fungus, Aspergillus luchuensis
Source: PubMed Central journal article supplement (PMC5849584; doi:10.1186/s13568-018-0569-4), 2018-03-13
Supplement: 13568_2018_569_MOESM1_ESM.pdf [file 13568_2018_569_MOESM1_ESM.pdf]

## Supplementary materials

**Journal name:** AMB Express

**Manuscript Title:** Vanillin production by biotransformation of phenolic compounds in fungus, *Aspergillus luchuensis*

**The name(s) of the author(s):** Junsei Taira (corresponding author), Rin Toyoshima, Nana Ameku, Akira Iguchi, Yasutomo Tamaki

**The affiliation(s) and address(es) of the author(s):**

Okinawa National College of Technology, Department of Bioresource Technology, 905 Henoko, Nago-city, Okinawa 905-2 192, Japan

The e-mail address, telephone and fax numbers of the corresponding author: Tel & Fax: +81 980-55-4207, E-mail: taira@okinawa-ct.ac.jp

Table S1. Candidate genes for vanillin production found in *Aspergillus luchuensis* genome

| Accession number  | Annotate description                                                                                                                                                                  | E-value   |
|-------------------|---------------------------------------------------------------------------------------------------------------------------------------------------------------------------------------|-----------|
| BCWF01000001-111  | sp Q5BB53 BGLI_EMENI Probable beta-glucosidase I OS= <i>Emericella nidulans</i> (strain FGSC A4 / ATCC 38163 / CBS 112.46 / NRRL 194 / M139) GN=bglI PE=2 SV=2 (839)                  | 2.00E-66  |
| BCWF01000001-40   | sp A2R0Z6 FAEB_ASPNC Probable feruloyl esterase B OS= <i>Aspergillus niger</i> (strain CBS 513.88 / FGSC A1513) GN=faeB PE=3 SV=1 (521)                                               | 0         |
| BCWF01000006-16   | sp Q05871 ECII_YEAST 3,2-trans-enoyl-CoA isomerase OS= <i>Saccharomyces cerevisiae</i> (strain ATCC 204508 / S288c) GN=ECII PE=1 SV=1 (280)                                           | 1.00E-36  |
| BCWF01000006-226  | sp Q4WGL5 SUN1_ASPFU Secreted beta-glucosidase sun1 OS= <i>Neosartorya fumigata</i> (strain ATCC MYA-4609 / Af293 / CBS 101355 / FGSC A1100) GN=sun1 PE=1 SV=1 (414)                  | 0         |
| BCWF01000006-280  | sp G4MS28 CEGT_MAGO7 Ceramide glucosyltransferase OS= <i>Magnaporthe oryzae</i> (strain 70-15 / ATCC MYA-4617 / FGSC 8958) GN=MGG_10668 PE=1 SV=1 (494)                               | 3.00E-158 |
| BCWF01000006-381  | sp A2QN74 BTGC_ASPNC Putative glucan endo-1,3-beta-glucosidase btgC OS= <i>Aspergillus niger</i> (strain CBS 513.88 / FGSC A1513) GN=btgC PE=3 SV=2 (684)                             | 0         |
| BCWF01000006-528  | sp Q09140 UGGG_SCHPO UDP-glucose:glycoprotein glucosyltransferase OS= <i>Schizosaccharomyces pombe</i> (strain 972 / ATCC 24843) GN=gpt1 PE=1 SV=2 (1448)                             | 0         |
| BCWF01000006-535  | sp P27034 BGLS_RHIRD Beta-glucosidase OS= <i>Rhizobium radiobacter</i> GN=cbg-1 PE=3 SV=1 (818)                                                                                       | 7.00E-114 |
| BCWF01000006-551  | sp A2QNQ5 ATG26_ASPNC Sterol 3-beta-glucosyltransferase OS= <i>Aspergillus niger</i> (strain CBS 513.88 / FGSC A1513) GN=atg26 PE=3 SV=2 (1371)                                       | 0         |
| BCWF01000006-829  | sp A2QPK4 BGLD_ASPNC Probable beta-glucosidase D OS= <i>Aspergillus niger</i> (strain CBS 513.88 / FGSC A1513) GN=bglD PE=3 SV=2 (754)                                                | 0         |
| BCWF01000006-97   | sp P49426 EXG1_COCCA Glucan 1,3-beta-glucosidase OS= <i>Cochliobolus carbonum</i> GN=EXG1 PE=1 SV=1 (788)                                                                             | 4.00E-126 |
| BCWF01000008-185  | sp O35459 ECH1_MOUSE Delta(3,5)-Delta(2,4)-dienoyl-CoA isomerase, mitochondrial OS= <i>Mus musculus</i> GN=Ech1 PE=1 SV=1 (327)                                                       | 2.00E-74  |
| BCWF01000008-195  | sp Q9FZE0 BGL40_ARATH Beta-glucosidase 40 OS= <i>Arabidopsis thaliana</i> GN=BGLU40 PE=2 SV=1 (510)                                                                                   | 3.00E-47  |
| BCWF01000009-8    | sp D4B0V1 E13B_ARTBC Probable glucan endo-1,3-beta-glucosidase ARB_02077 OS= <i>Arthroderma benhamiae</i> (strain ATCC MYA-4681 / CBS 112371) GN=ARB_02077 PE=1 SV=1 (878)            | 4.00E-102 |
| BCWF01000009-95   | sp D4AS70 FAE1_ARTBC Probable feruloyl esterase ARB_07085 OS= <i>Arthroderma benhamiae</i> (strain ATCC MYA-4681 / CBS 112371) GN=ARB_07085 PE=1 SV=1 (537)                           | 4.00E-89  |
| BCWF01000010-127  | sp D4AS70 FAE1_ARTBC Probable feruloyl esterase ARB_07085 OS= <i>Arthroderma benhamiae</i> (strain ATCC MYA-4681 / CBS 112371) GN=ARB_07085 PE=1 SV=1 (537)                           | 3.00E-122 |
| BCWF01000010-325  | sp O74799 EXG3_SCHPO Glucan 1,3-beta-glucosidase 3 OS= <i>Schizosaccharomyces pombe</i> (strain 972 / ATCC 24843) GN=exg3 PE=3 SV=1 (464)                                             | 9.00E-08  |
| BCWF01000010-343  | sp P87076 BGLA_ASPKW Beta-glucosidase A OS= <i>Aspergillus kawachii</i> (strain NBRC 4308) GN=bglA PE=1 SV=2 (860)                                                                    | 0         |
| BCWF01000010-391  | sp O05619 VDH_PSEUH Vanillin dehydrogenase OS= <i>Pseudomonas</i> sp. (strain HR199 / DSM 7063) GN=vdh PE=1 SV=1 (481)                                                                | 2.00E-100 |
| BCWF01000010-395  | sp A2RAR6 EXGA_ASPNC Probable glucan 1,3-beta-glucosidase A OS= <i>Aspergillus niger</i> (strain CBS 513.88 / FGSC A1513) GN=exgA PE=3 SV=1 (416)                                     | 0         |
| BCWF01000010-529  | sp Q9F234 AGL2_BACTQ Alpha-glucosidase 2 OS= <i>Bacillus thermoamyloliquefaciens</i> PE=3 SV=1 (787)                                                                                  | 2.00E-52  |
| BCWF01000015-126  | sp D4AS70 FAE1_ARTBC Probable feruloyl esterase ARB_07085 OS= <i>Arthroderma benhamiae</i> (strain ATCC MYA-4681 / CBS 112371) GN=ARB_07085 PE=1 SV=1 (537)                           | 6.00E-96  |
| BCWF01000015-37   | sp A5ABF5 BGLM_ASPNC Probable beta-glucosidase M OS= <i>Aspergillus niger</i> (strain CBS 513.88 / FGSC A1513) GN=bglM PE=3 SV=1 (765)                                                | 0         |
| BCWF01000015-401  | sp Q05871 ECII_YEAST 3,2-trans-enoyl-CoA isomerase OS= <i>Saccharomyces cerevisiae</i> (strain ATCC 204508 / S288c) GN=ECII PE=1 SV=1 (280)                                           | 3.00E-40  |
| BCWF01000015-590  | sp Q2UN12 BGLF_ASPOR Probable beta-glucosidase F OS= <i>Aspergillus oryzae</i> (strain ATCC 42149 / RIB 40) GN=bglF PE=3 SV=1 (866)                                                   | 0         |
| BCWF01000015-77   | sp Q9XIG1 U80B1_ARATH Sterol 3-beta-glucosyltransferase UGT80B1 OS= <i>Arabidopsis thaliana</i> GN=UGT80B1 PE=2 SV=1 (615)                                                            | 2.00E-09  |
| BCWF01000015-78   | sp Q9XIG1 U80B1_ARATH Sterol 3-beta-glucosyltransferase UGT80B1 OS= <i>Arabidopsis thaliana</i> GN=UGT80B1 PE=2 SV=1 (615)                                                            | 3.00E-77  |
| BCWF01000016-15   | sp P27034 BGLS_RHIRD Beta-glucosidase OS= <i>Rhizobium radiobacter</i> GN=cbg-1 PE=3 SV=1 (818)                                                                                       | 1.00E-169 |
| BCWF01000017-1081 | sp O43053 ALG6_SCHPO Probable dolichyl pyrophosphate Man9GlcNAc2 alpha-1,3-glucosyltransferase OS= <i>Schizosaccharomyces pombe</i> (strain 972 / ATCC 24843) GN=alg6 PE=3 SV=1 (506) | 5.00E-133 |
| BCWF01000017-1129 | sp P53626 E13B_TRIHA Glucan endo-1,3-beta-glucosidase BGN13.1 OS= <i>Trichoderma harzianum</i> GN=bgn13.1 PE=1 SV=1 (762)                                                             | 1.00E-90  |
| BCWF01000017-1136 | sp Q9P6J3 MALT_SCHPO Alpha-glucosidase OS= <i>Schizosaccharomyces pombe</i> (strain 972 / ATCC 24843) GN=mal1 PE=2 SV=1 (579)                                                         | 0         |
| BCWF01000017-346  | sp D4B0V1 E13B_ARTBC Probable glucan endo-1,3-beta-glucosidase ARB_02077 OS= <i>Arthroderma benhamiae</i> (strain ATCC MYA-4681 / CBS 112371) GN=ARB_02077 PE=1 SV=1 (878)            | 0         |
| BCWF01000017-438  | sp D4AS70 FAE1_ARTBC Probable feruloyl esterase ARB_07085 OS= <i>Arthroderma benhamiae</i> (strain ATCC MYA-4681 / CBS 112371) GN=ARB_07085 PE=1 SV=1 (537)                           | 2.00E-93  |
| BCWF01000017-501  | sp Q4WRH9 AGDC_ASPFU Probable alpha/beta-glucosidase agdC OS= <i>Neosartorya fumigata</i> (strain ATCC MYA-4609 / Af293 / CBS 101355 / FGSC A1100) GN=agdC PE=3 SV=1 (881)            | 0         |
| BCWF01000017-604  | sp F4JML5 ECH2M_ARATH Probable enoyl-CoA hydratase 2, mitochondrial OS= <i>Arabidopsis thaliana</i> GN=At4g16800 PE=2 SV=1 (301)                                                      | 2.00E-54  |
| BCWF01000017-681  | sp Q9XIG1 U80B1_ARATH Sterol 3-beta-glucosyltransferase UGT80B1 OS= <i>Arabidopsis thaliana</i> GN=UGT80B1 PE=2 SV=1 (615)                                                            | 9.00E-13  |
| BCWF01000017-880  | sp G3V9D0 PGLT1_RAT Protein O-glucosyltransferase 1 OS= <i>Rattus norvegicus</i> GN=Poglut1 PE=3 SV=1 (392)                                                                           | 6.00E-09  |
| BCWF01000018-649  | sp A2QPK4 BGLD_ASPNC Probable beta-glucosidase D OS= <i>Aspergillus niger</i> (strain CBS 513.88 / FGSC A1513) GN=bglD PE=3 SV=2 (754)                                                | 8.00E-36  |
| BCWF01000018-75   | sp Q0CBM7 FAEA_ASPTN Probable feruloyl esterase A OS= <i>Aspergillus terreus</i> (strain NIH 2624 / FGSC A1156) GN=faeA PE=3 SV=1 (281)                                               | 2.00E-20  |
| BCWF01000019-184  | sp A5ABF5 BGLM_ASPNC Probable beta-glucosidase M OS= <i>Aspergillus niger</i> (strain CBS 513.88 / FGSC A1513) GN=bglM PE=3 SV=1 (765)                                                | 0         |
| BCWF01000020-280  | sp Q2UP89 FAEB1_ASPOR Probable feruloyl esterase B-1 OS= <i>Aspergillus oryzae</i> (strain ATCC 42149 / RIB 40) GN=faeB-1 PE=1 SV=1 (540)                                             | 6.00E-92  |
| BCWF01000020-313  | sp Q25BW5 BGL1A_PHACH Beta-glucosidase 1A OS= <i>Phanerochaete chrysosporium</i> GN=BGL1A PE=1 SV=1 (462)                                                                             | 1.00E-53  |

|                  |                                                                                                                                                                                                |           |
|------------------|------------------------------------------------------------------------------------------------------------------------------------------------------------------------------------------------|-----------|
| BCWF01000020-519 | sp A2QPK4 BGLD_ASPNC Probable beta-glucosidase D OS=Aspergillus niger (strain CBS 513.88 / FGSC A1513) GN=bgID PE=3 SV=2 (754)                                                                 | 0         |
| BCWF01000020-549 | sp O94511 YN67_SCHPO Putative enoyl reductase C646.07c OS=Schizosaccharomyces pombe (strain 972 / ATCC 24843) GN=SPBC646.07c PE=3 SV=1 (295)                                                   | 3.00E-71  |
| BCWF01000020-629 | sp P56526 AGLU_ASPNG Alpha-glucosidase OS=Aspergillus niger GN=aglA PE=1 SV=1 (985)                                                                                                            | 0         |
| BCWF01000020-760 | sp Q2UB20 ALG8_ASPOR Dolichyl pyrophosphate Glc1Man9GlcNAc2 alpha-1,3-glucosyltransferase OS=Aspergillus oryzae (strain ATCC 42149 / RIB 40) GN=alg8 PE=3 SV=1 (504)                           | 0         |
| BCWF01000020-776 | sp Q7D745 Y2525_MYCTO Putative trans-acting enoyl reductase MT2525 OS=Mycobacterium tuberculosis (strain CDC 1551 / Oshkosh) GN=MT2525 PE=3 SV=2 (419)                                         | 1.00E-31  |
| BCWF01000021-150 | sp Q1ZXF1 ECHM_DICDI Probable enoyl-CoA hydratase, mitochondrial OS=Dictyostelium discoideum GN=echs1 PE=3 SV=1 (277)                                                                          | 3.00E-101 |
| BCWF01000021-170 | sp Q4X162 ALG10_ASPFU Dol-P-Glc:Glc(2)Man(9)GlcNAc(2)-PP-Dol alpha-1,2-glucosyltransferase OS=Neosartorya fumigata (strain ATCC MYA-4609 / Af293 / CBS 101355 / FGSC A1100) GN=alg10 PE=3 SV=1 | 0         |
| BCWF01000021-231 | sp P96559 GTFB_AMYOR Vancomycin aglycone glucosyltransferase OS=Amycolatopsis orientalis GN=gtfB PE=1 SV=1 (407)                                                                               | 1.00E-06  |
| BCWF01000021-992 | sp Q01336 YCR2_ESCVU Uncharacterized family 31 glucosidase ORF2 (Fragment) OS=Escherichia vulneris PE=3 SV=1 (529)                                                                             | 0         |
| BCWF01000023-149 | sp Q2UP89 FAEB1_ASPOR Probable feruloyl esterase B-1 OS=Aspergillus oryzae (strain ATCC 42149 / RIB 40) GN=faeB-1 PE=1 SV=1 (540)                                                              | 7.00E-92  |
| BCWF01000023-178 | sp O05619 VDH_PSEUH Vanillin dehydrogenase OS=Pseudomonas sp. (strain HR199 / DSM 7063) GN=vdh PE=1 SV=1 (481)                                                                                 | 5.00E-75  |
| BCWF01000024-102 | sp A2QX52 EXGD_ASPNC Probable glucan 1,3-beta-glucosidase D OS=Aspergillus niger (strain CBS 513.88 / FGSC A1513) GN=exgD PE=3 SV=1 (830)                                                      | 0         |
| BCWF01000025-366 | sp Q2UP89 FAEB1_ASPOR Probable feruloyl esterase B-1 OS=Aspergillus oryzae (strain ATCC 42149 / RIB 40) GN=faeB-1 PE=1 SV=1 (540)                                                              | 4.00E-67  |
| BCWF01000026-16  | sp O05619 VDH_PSEUH Vanillin dehydrogenase OS=Pseudomonas sp. (strain HR199 / DSM 7063) GN=vdh PE=1 SV=1 (481)                                                                                 | 3.00E-108 |
| BCWF01000026-7   | sp Q2US39 BTGE_ASPOR Probable beta-glucosidase btgE OS=Aspergillus oryzae (strain ATCC 42149 / RIB 40) GN=btgE PE=3 SV=1 (602)                                                                 | 0         |
| BCWF01000028-305 | sp D4B2W4 BGL2_ARTBC Glucan 1,3-beta-glucosidase ARB_02797 OS=Arthroderma benhamiae (strain ATCC MYA-4681 / CBS 112371) GN=ARB_02797 PE=1 SV=1 (308)                                           | 5.00E-121 |
| BCWF01000028-86  | sp A2RAR6 EXGA_ASPNC Probable glucan 1,3-beta-glucosidase A OS=Aspergillus niger (strain CBS 513.88 / FGSC A1513) GN=exgA PE=3 SV=1 (416)                                                      | 3.00E-25  |
| BCWF01000029-114 | sp Q2UP89 FAEB1_ASPOR Probable feruloyl esterase B-1 OS=Aspergillus oryzae (strain ATCC 42149 / RIB 40) GN=faeB-1 PE=1 SV=1 (540)                                                              | 2.00E-19  |
| BCWF01000029-134 | sp Q2UTX5 BGLE_ASPOR Probable beta-glucosidase E OS=Aspergillus oryzae (strain ATCC 42149 / RIB 40) GN=bgIE PE=3 SV=2 (1048)                                                                   | 0         |
| BCWF01000029-177 | sp O14255 GCS1_SCHPO Probable mannosyl-oligosaccharide glucosidase OS=Schizosaccharomyces pombe (strain 972 / ATCC 24843) GN=SPAC6G10.09 PE=3 SV=1 (808)                                       | 0         |
| BCWF01000029-193 | sp Q05871 ECI1_YEAST 3,2-trans-enoyl-CoA isomerase OS=Saccharomyces cerevisiae (strain ATCC 204508 / S288c) GN=ECI1 PE=1 SV=1 (280)                                                            | 9.00E-54  |
| BCWF01000029-43  | sp P32573 SPS19_YEAST Peroxisomal 2,4-dienoyl-CoA reductase SPS19 OS=Saccharomyces cerevisiae (strain ATCC 204508 / S288c) GN=SPS19 PE=1 SV=4 (292)                                            | 7.00E-84  |
| BCWF01000030-146 | sp A2QH21 EGLC_ASPNC Probable glucan endo-1,3-beta-glucosidase eglC OS=Aspergillus niger (strain CBS 513.88 / FGSC A1513) GN=eglC PE=3 SV=2 (460)                                              | 0         |
| BCWF01000030-155 | sp A1DFA8 BGLI_NEOFI Probable beta-glucosidase I OS=Neosartorya fischeri (strain ATCC 1020 / DSM 3700 / CBS 544.65 / FGSC A1164 / JCM 1740 / NRRL 181 / WB 181) GN=bgII PE=3 SV=1 (838)        | 0         |
| BCWF01000030-3   | sp Q25BW4 BGL1B_PHACH Beta-glucosidase 1B OS=Phanerochaete chrysosporium GN=BGL1B PE=1 SV=1 (540)                                                                                              | 0         |
| BCWF01000030-54  | sp P40350 ALG5_YEAST Dolichyl-phosphate beta-glucosyltransferase OS=Saccharomyces cerevisiae (strain ATCC 204508 / S288c) GN=ALG5 PE=1 SV=1 (334)                                              | 2.00E-75  |
| BCWF01000032-211 | sp Q2UP89 FAEB1_ASPOR Probable feruloyl esterase B-1 OS=Aspergillus oryzae (strain ATCC 42149 / RIB 40) GN=faeB-1 PE=1 SV=1 (540)                                                              | 1.00E-80  |
| BCWF01000032-49  | sp D4AS70 FAE1_ARTBC Probable feruloyl esterase ARB_07085 OS=Arthroderma benhamiae (strain ATCC MYA-4681 / CBS 112371) GN=ARB_07085 PE=1 SV=1 (537)                                            | 3.00E-33  |
| BCWF01000033-14  | sp Q6CBE4 ETR1_YARLI Probable trans-2-enoyl-CoA reductase, mitochondrial OS=Yarrowia lipolytica (strain CLIB 122 / E 150) GN=ETR1 PE=3 SV=1 (376)                                              | 7.00E-93  |
| BCWF01000034-14  | sp Q56078 BGLX_SALTY Periplasmic beta-glucosidase OS=Salmonella typhimurium (strain LT2 / SGSC1412 / ATCC 700720) GN=bgIX PE=3 SV=2 (765)                                                      | 3.00E-115 |
| BCWF01000034-31  | sp A2R989 BGLI_ASPNC Probable beta-glucosidase I OS=Aspergillus niger (strain CBS 513.88 / FGSC A1513) GN=bgII PE=3 SV=1 (818)                                                                 | 0         |
| BCWF01000036-120 | sp O13716 AGN1_SCHPO Glucan endo-1,3-alpha-glucosidase agn1 OS=Schizosaccharomyces pombe (strain 972 / ATCC 24843) GN=agn1 PE=1 SV=2 (424)                                                     | 1.00E-50  |
| BCWF01000036-126 | sp Q5B0F4 BGLG_EMENI Probable beta-glucosidase G OS=Emericella nidulans (strain FGSC A4 / ATCC 38163 / CBS 112.46 / NRRL 194 / M139) GN=bgIG PE=3 SV=2 (819)                                   | 0         |
| BCWF01000036-127 | sp Q2U325 BGLG_ASPOR Probable beta-glucosidase G OS=Aspergillus oryzae (strain ATCC 42149 / RIB 40) GN=bgIG PE=3 SV=1 (815)                                                                    | 0         |
| BCWF01000036-134 | sp Q9XIG1 U80B1_ARATH Sterol 3-beta-glucosyltransferase UGT80B1 OS=Arabidopsis thaliana GN=UGT80B1 PE=2 SV=1 (615)                                                                             | 7.00E-126 |
| BCWF01000036-145 | sp D4AS70 FAE1_ARTBC Probable feruloyl esterase ARB_07085 OS=Arthroderma benhamiae (strain ATCC MYA-4681 / CBS 112371) GN=ARB_07085 PE=1 SV=1 (537)                                            | 7.00E-10  |
| BCWF01000036-163 | sp Q2UP89 FAEB1_ASPOR Probable feruloyl esterase B-1 OS=Aspergillus oryzae (strain ATCC 42149 / RIB 40) GN=faeB-1 PE=1 SV=1 (540)                                                              | 1.00E-72  |
| BCWF01000036-45  | sp O05619 VDH_PSEUH Vanillin dehydrogenase OS=Pseudomonas sp. (strain HR199 / DSM 7063) GN=vdh PE=1 SV=1 (481)                                                                                 | 2.00E-100 |
| BCWF01000036-8   | sp B0X1Q4 RUMI_CULQU O-glucosyltransferase rumi homolog OS=Culex quinquefasciatus GN=CPIJ013394 PE=3 SV=1 (403)                                                                                | 2.00E-11  |
| BCWF01000040-41  | sp Q9P6J3 MALT_SCHPO Alpha-glucosidase OS=Schizosaccharomyces pombe (strain 972 / ATCC 24843) GN=malI PE=2 SV=1 (579)                                                                          | 2.00E-149 |
